# Supplementary material for: A Weakest Precondition Model for Assembly Language Programs
Source: Royal Society of Chemistry journal article supplement (doi:10.1039/b518151h), 2003-01-01
Supplement: b518151h.pdf [file b518151h.pdf]

# A novel heterobifunctional linker for facile access to bio-conjugates

**Yashveer Singh, Nicolas Spinelli, Eric Defrancq\* and Pascal Dumy**

*LEDSS, UMR CNRS 5616, ICMG FR 2607, Université Joseph Fourier, 301 Rue De La Chimie, BP 53, F 38041, Grenoble Cedex 9, France.*

*Email: Eric.Defrancq@ujf-grenoble.fr*

## <sup>5</sup> Table of contents

|                  |                                                                                    |    |
|------------------|------------------------------------------------------------------------------------|----|
| I.               | Melting studies. ....                                                              | 2  |
| II.              | Circular dichroism (CD) studies.....                                               | 2  |
| III.             | Spectroscopic characterisation of heterobifunctional linker <b>1</b> .....         | 3  |
| IV.              | Spectroscopic characterisation of peptide-oligonucleotide conjugate <b>4</b> ..... | 6  |
| <sup>10</sup> V. | Spectroscopic characterisation of cysteine RGD peptide <b>5</b> .....              | 7  |
| VI.              | Spectroscopic characterisation of RGD peptide <b>6</b> .....                       | 7  |
| VII.             | Spectroscopic characterisation of RGD peptide <b>7</b> .....                       | 8  |
| VIII.            | Spectroscopic characterisation of oligonucleotide 3'-aldehyde <b>8</b> .....       | 9  |
| IX.              | Spectroscopic characterisation of free aminoxy linker <b>9</b> .....               | 10 |
| <sup>15</sup> X. | Spectroscopic characterisation of oligonucleotide linker conjugate <b>10</b> ..... | 11 |
| XI.              | DTT treatment <sup>1</sup> of oligonucleotide-linker conjugate <b>10</b> .....     | 12 |
| XII.             | Notes and references .....                                                         | 12 |

## I. Melting studies

<sup>20</sup> The melting curves (absorbance *versus* temperature) were recorded at 260 nm on a UV–Visible spectrophotometer equipped with a temperature controller. The melting experiments were carried out by mixing the equimolar amount of two oligonucleotide strands in a solution of sodium phosphate buffer (10 mM; pH=7.0) containing EDTA (1 mM) and NaCl (100 mM). The ODN concentration was kept at 12  $\mu$ M. The absorbance was recorded in the temperature range of 10–80  $^{\circ}$ C at a sweep rate of 1  $^{\circ}$ C  $\text{min}^{-1}$ . All experiments were done in triplicate. The respective melting temperatures obtained are collected below in Table 1.

**Table 1.** Melting temperature of the duplex formed by the unmodified ODN and conjugate with the complementary sequence<sup>a</sup>.

| Oligonucleotides                            | $T_m \pm 0.5$ $^{\circ}$ C |
|---------------------------------------------|----------------------------|
| Unmodified 11-mer + complementary sequence  | 61.0                       |
| Conjugate <b>4</b> + complementary sequence | 62.1                       |

<sup>a</sup> The ODN sequence is 5'-CGCACACACGC-3' and the complementary sequence is 5'-GCGTGTGTGCG-3'.

25

## II. Circular dichroism (CD) studies

The CD experiments were carried out by mixing the equimolar amount of two-oligonucleotide strands in a 10 mM sodium phosphate buffer (pH = 7.0) containing EDTA (1mM) and NaCl (100 mM). The ODN concentration was kept at 12  $\mu$ M.

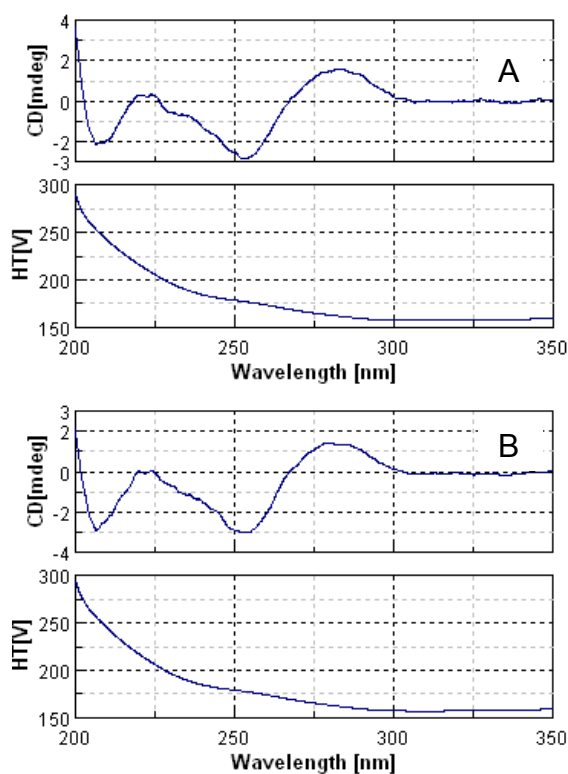

**Fig 1.** CD spectra for the duplexes formed by unmodified 11-mer oligonucleotide (A) and peptide–oligonucleotide conjugate **4** (B) with the complementary sequence.

30 III The spectroscopic characterisation data for heterobifunctional linker 1

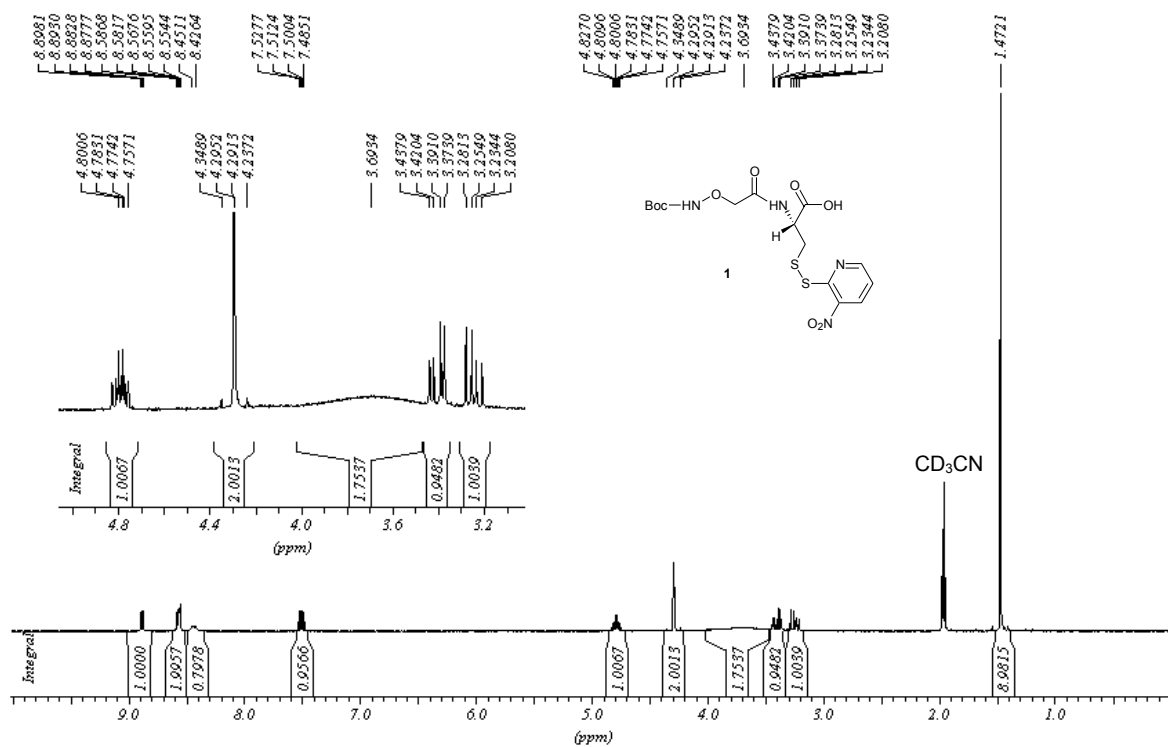

Fig 2. <sup>1</sup>H NMR (CD<sub>3</sub>CN, 300 MHz) spectrum of heterobifunctional linker 1.

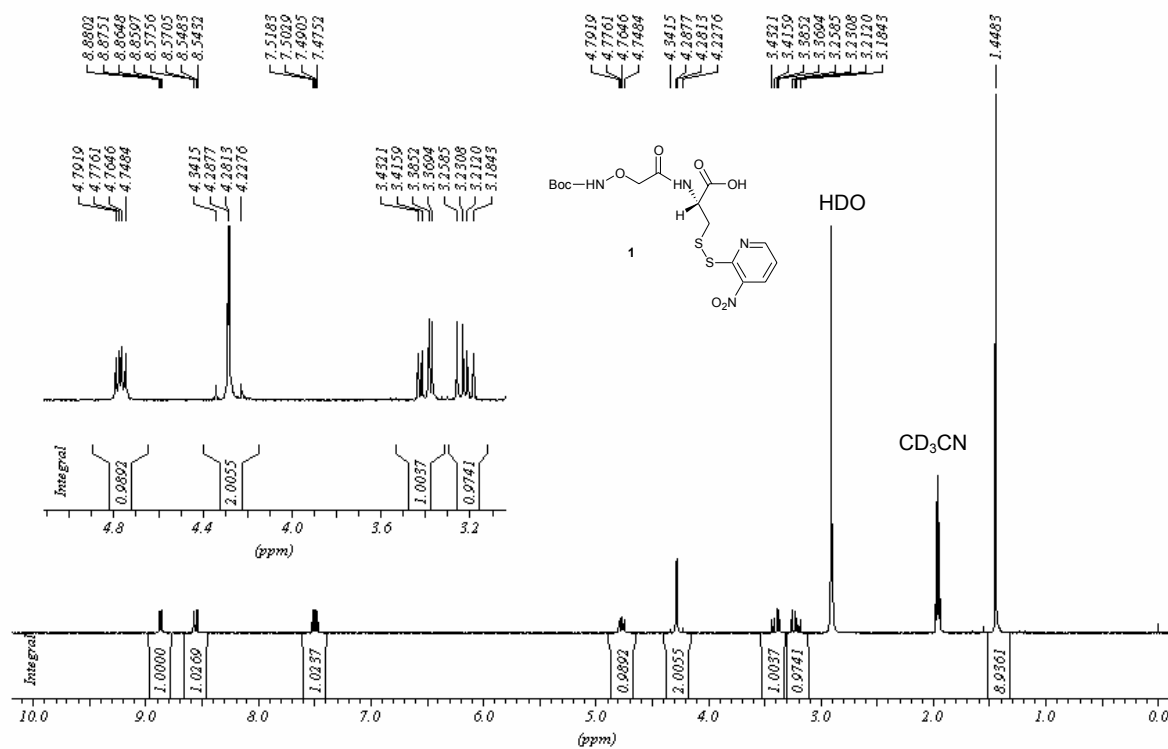

Fig 3. <sup>1</sup>H NMR (CD<sub>3</sub>CN/D<sub>2</sub>O 6:1, 300 MHz) spectrum of heterobifunctional linker 1.

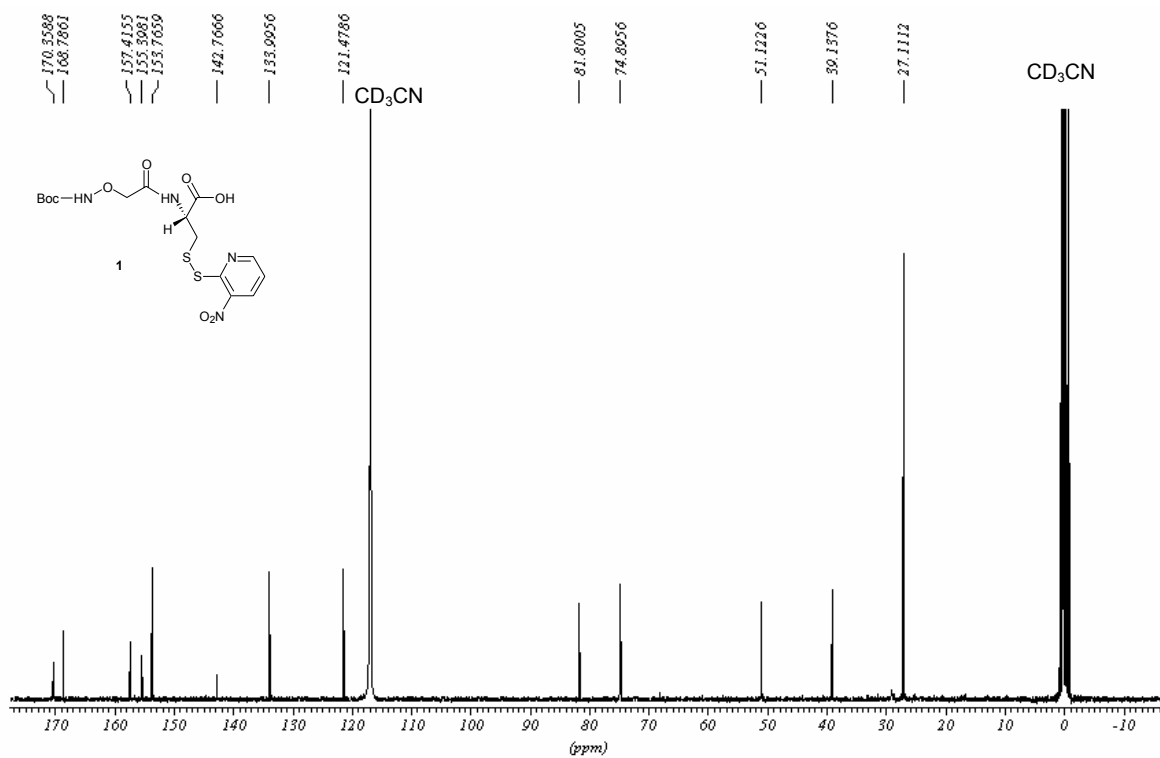

Fig 4. <sup>13</sup>C NMR (CD<sub>3</sub>CN, 300 MHz) spectrum of heterobifunctional linker 1.

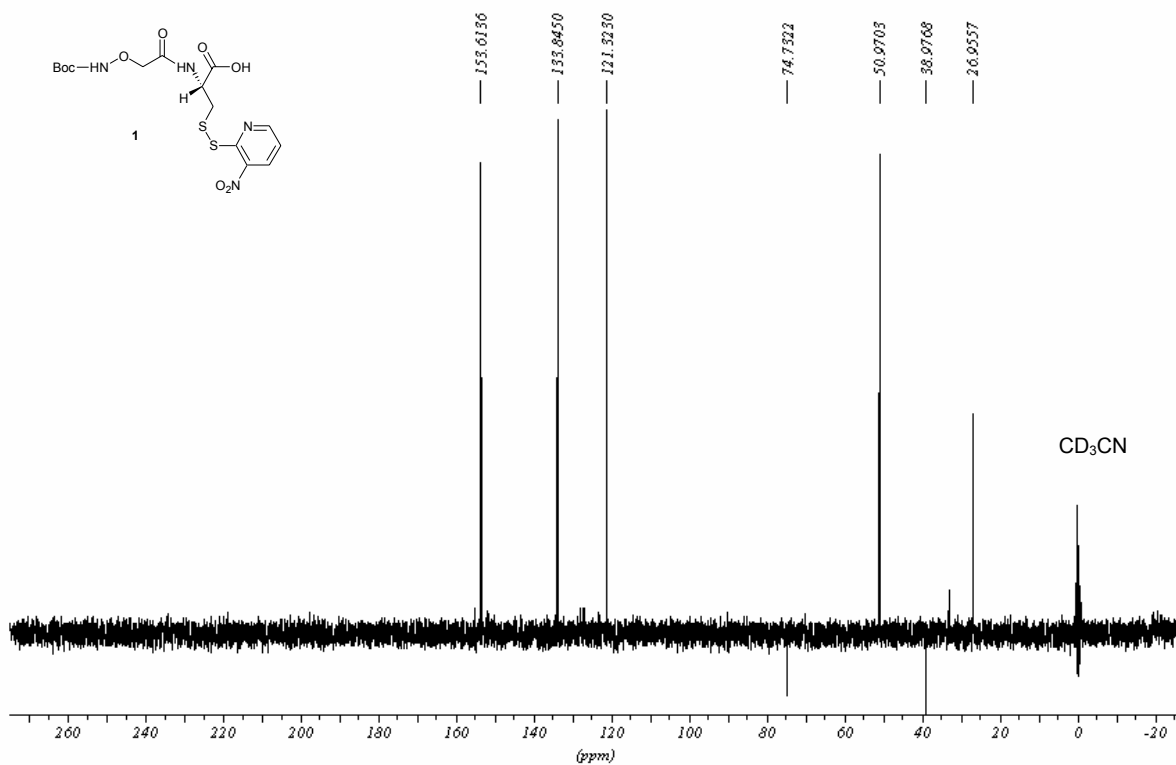

Fig 5. DEPT <sup>13</sup>C NMR (CD<sub>3</sub>CN, 300 MHz,  $\theta = 120^\circ$ ) spectrum of heterobifunctional linker 1.

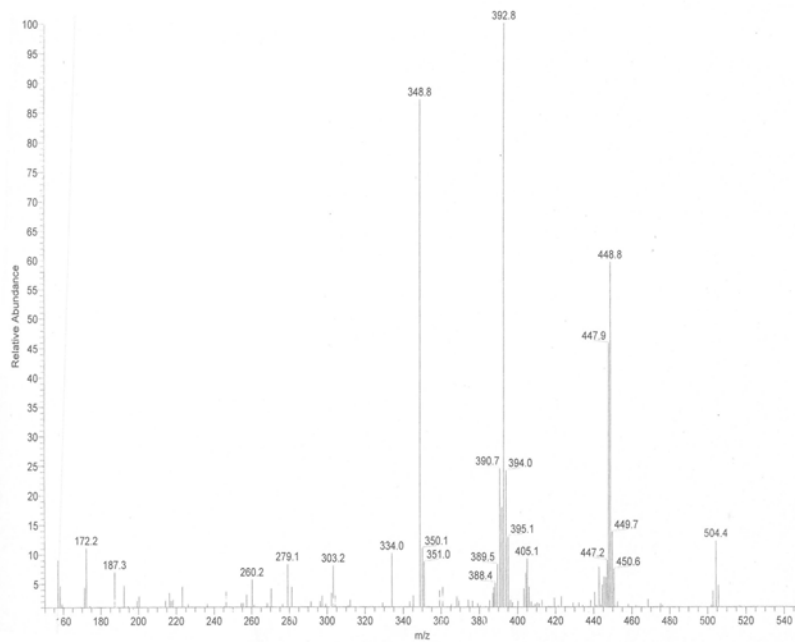

**Fig 6.** DCI mass spectra of heterobifunctional linker 1 ( $m/z$ : calcd 448.5).

35

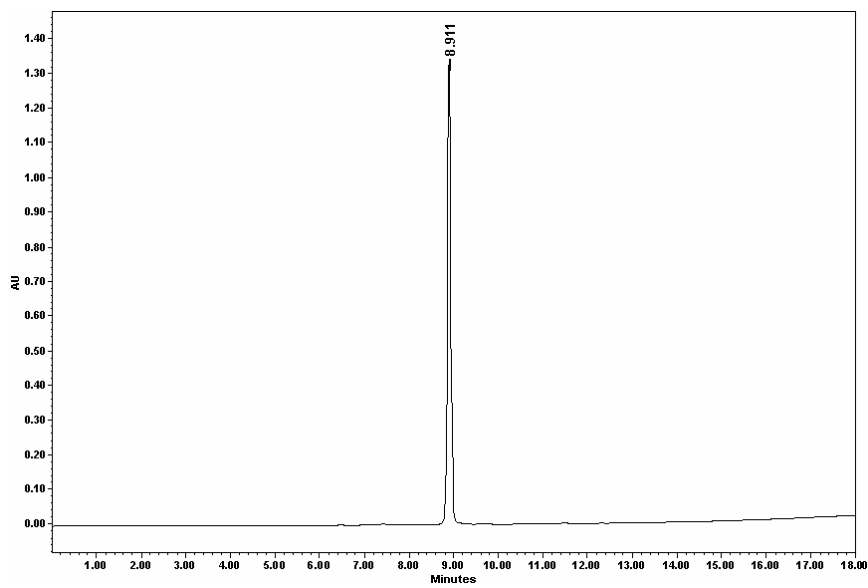

**Fig 7.** RP-HPLC profile ( $\lambda_{\text{abs}} = 250 \text{ nm}$ ) of heterobifunctional linker 1.

40

45

#### IV. Characterisation data for peptide–oligonucleotide conjugate 4

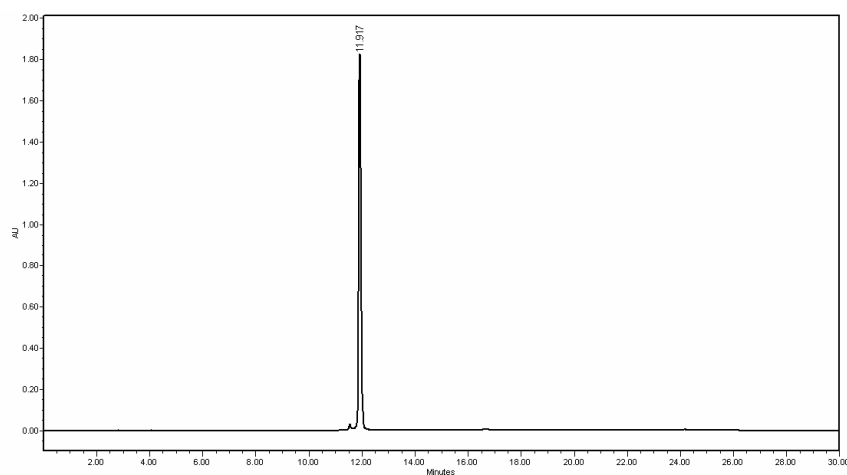

**Fig 8.** RP-HPLC profile ( $\lambda_{\text{abs}} = 260 \text{ nm}$ ) of purified peptide–oligonucleotide conjugate **4** synthesised from **7**.

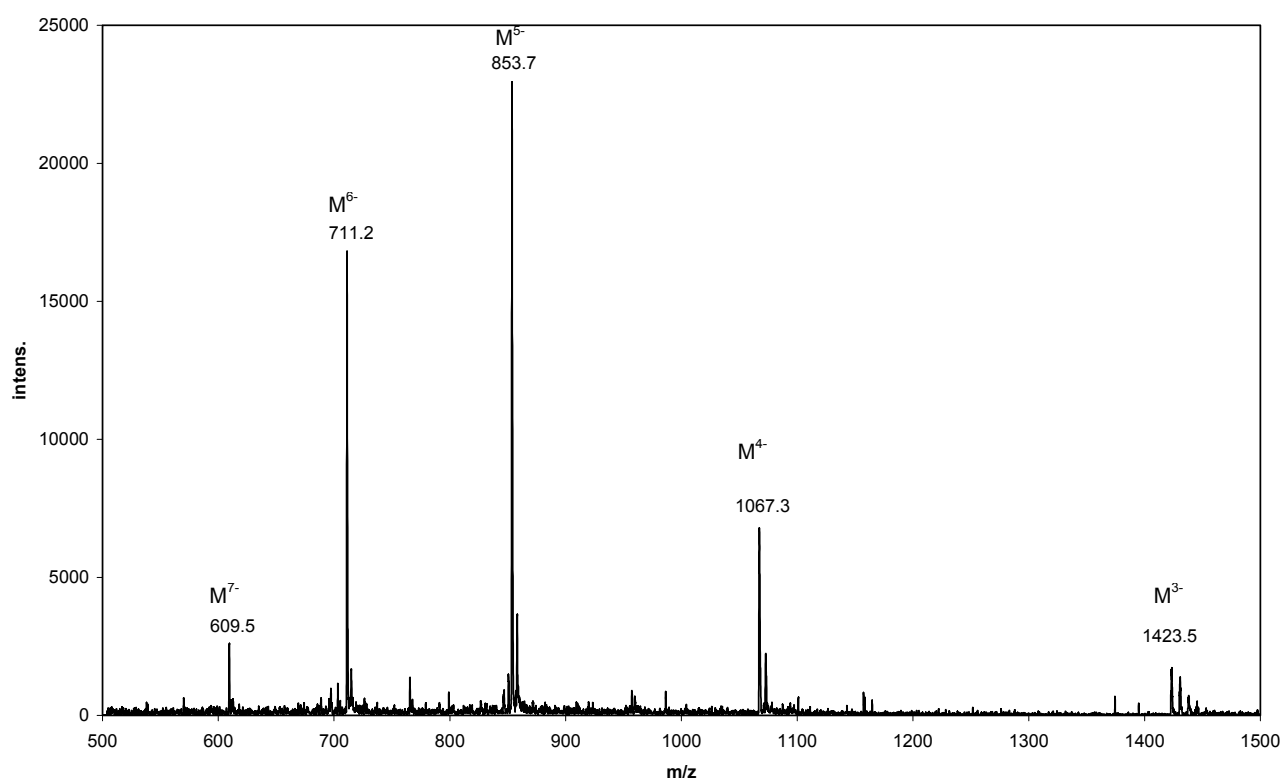

**Fig 9.** ESIMS (negative mode) of purified peptide–oligonucleotide conjugate **4** synthesised from **7** ( $m/z$ : calcd = 4274.2).

## V. RP-HPLC profile of cysteine RGD peptide 5

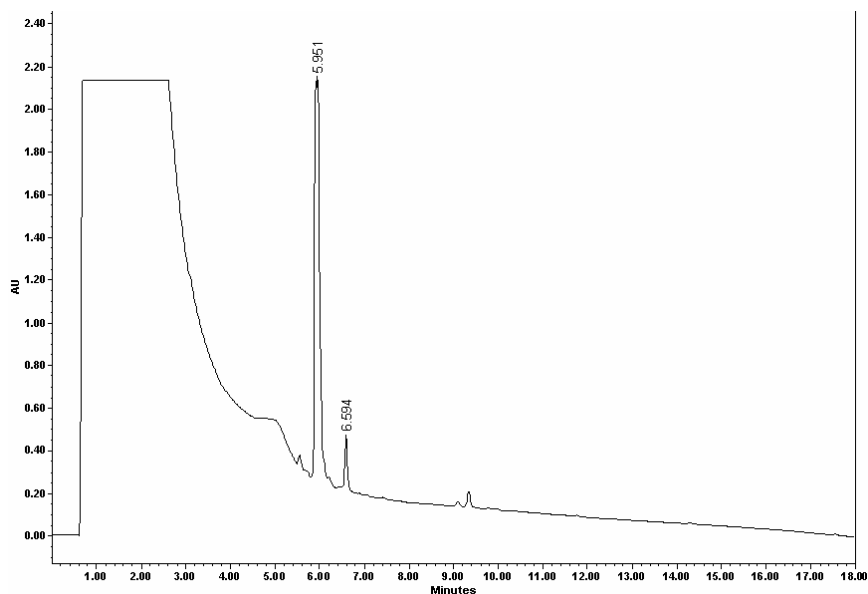

Fig 10. RP-HPLC profile ( $\lambda_{\text{abs}} = 260 \text{ nm}$ ) of purified RGD-cysteine peptide 5.

## VI. Spectroscopic characterisation data for RGD peptide-linker conjugate 6 (Boc Protected)

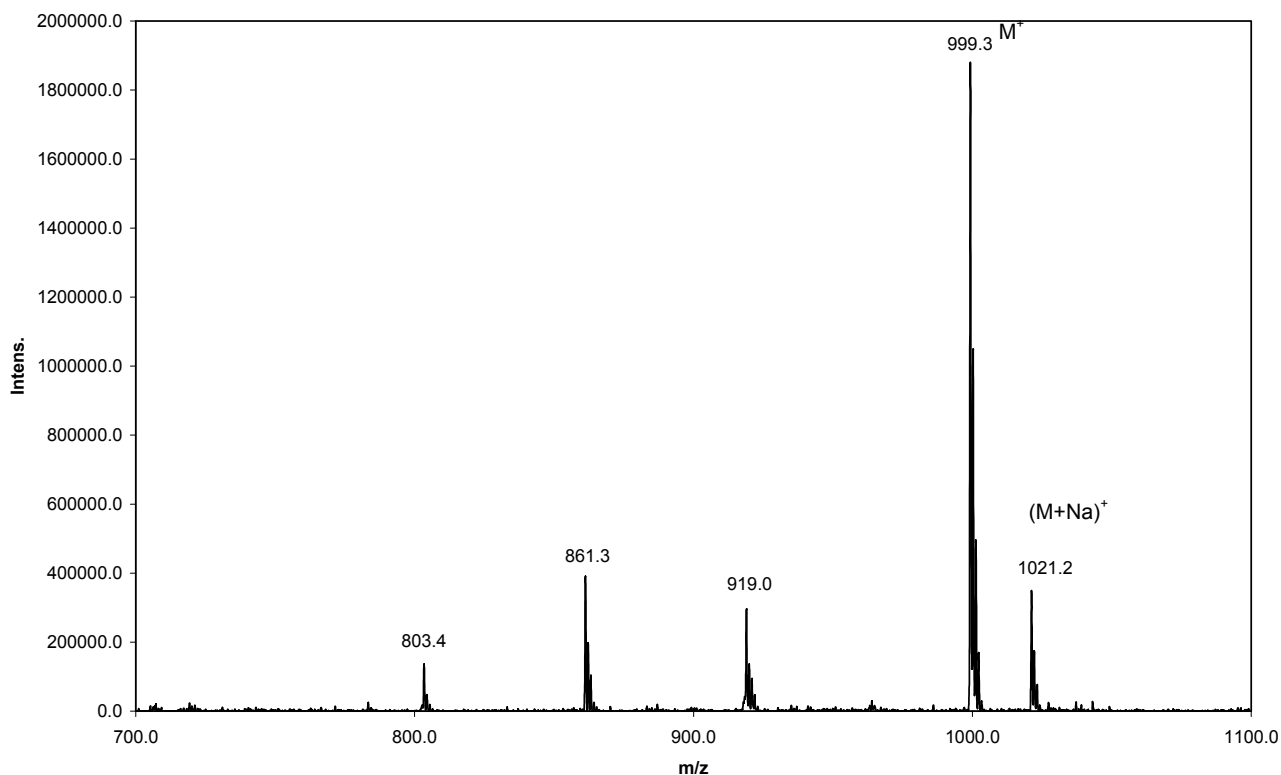

Fig 11. ESIMS (positive mode) of crude RGD peptide-linker conjugate 6 ( $m/z$ : calcd = 1000.1).

## VII. Spectroscopic characterisation data for RGD peptide-linker conjugate 7 (Boc free)

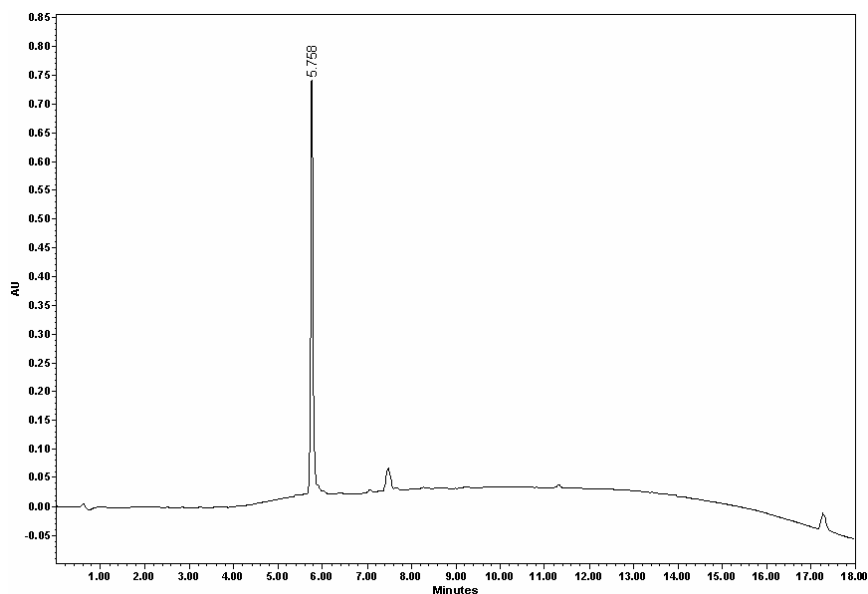

Fig 12. RP-HPLC profile ( $\lambda_{\text{abs}} = 700\text{nm}$ ) of purified RGD peptide-linker conjugate 7.

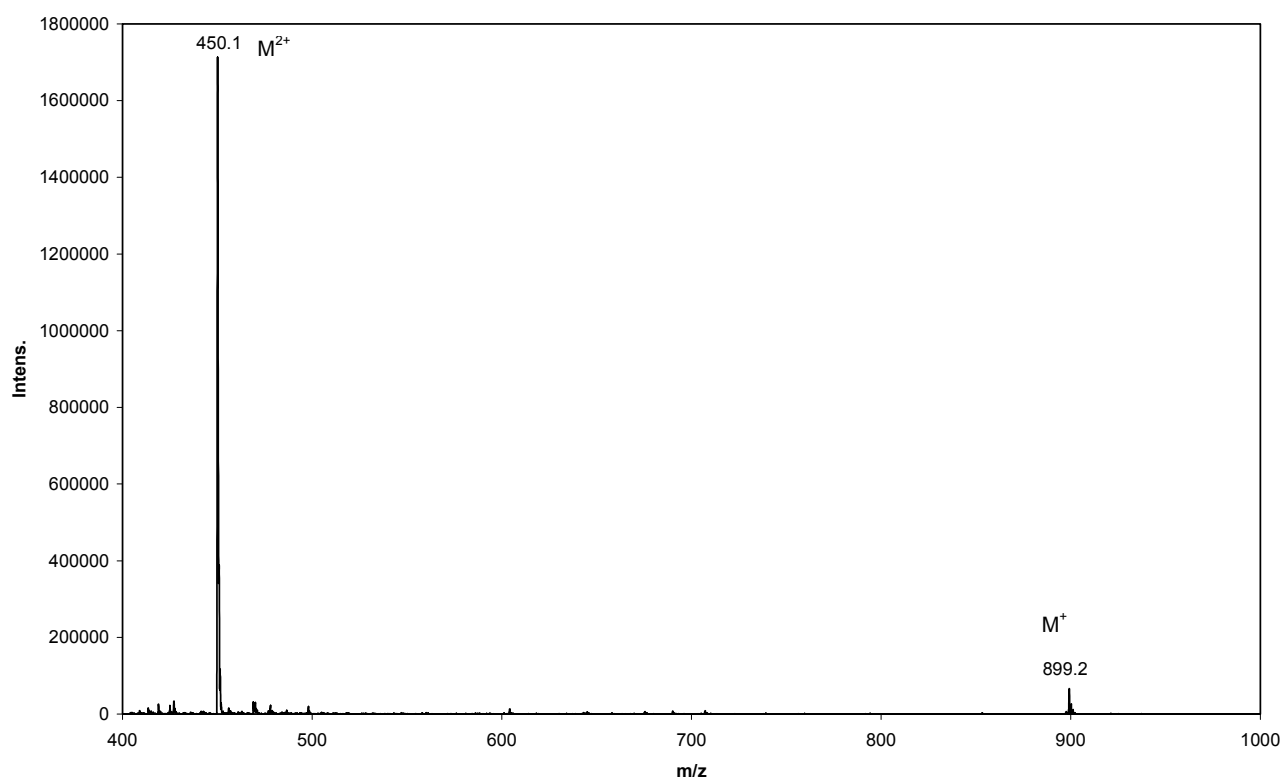

Fig 13. ESIMS (positive mode) of purified RGD peptide 7 ( $m/z$ : calcd = 899.0).



### VIII. Spectroscopic characterisation data for oligonucleotide 3'-aldehyde **8**

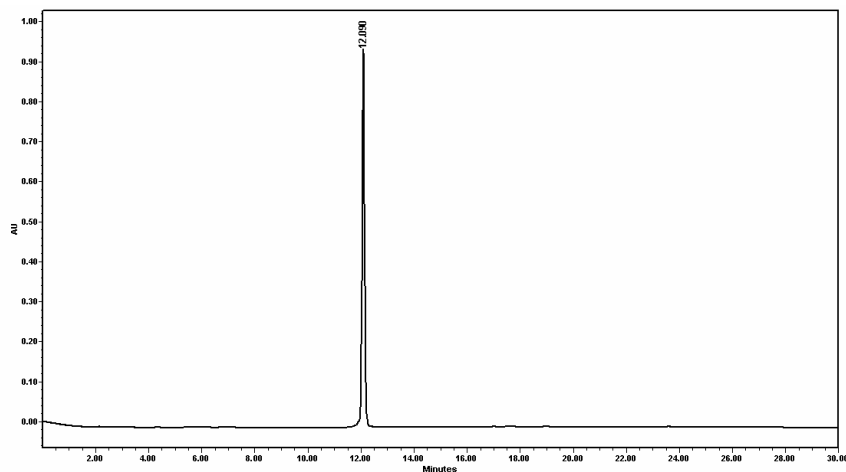

Fig 14. RP-HPLC ( $\lambda_{\text{abs}} = 260 \text{ nm}$ ) of purified oligonucleotide 3'-aldehyde **8**.

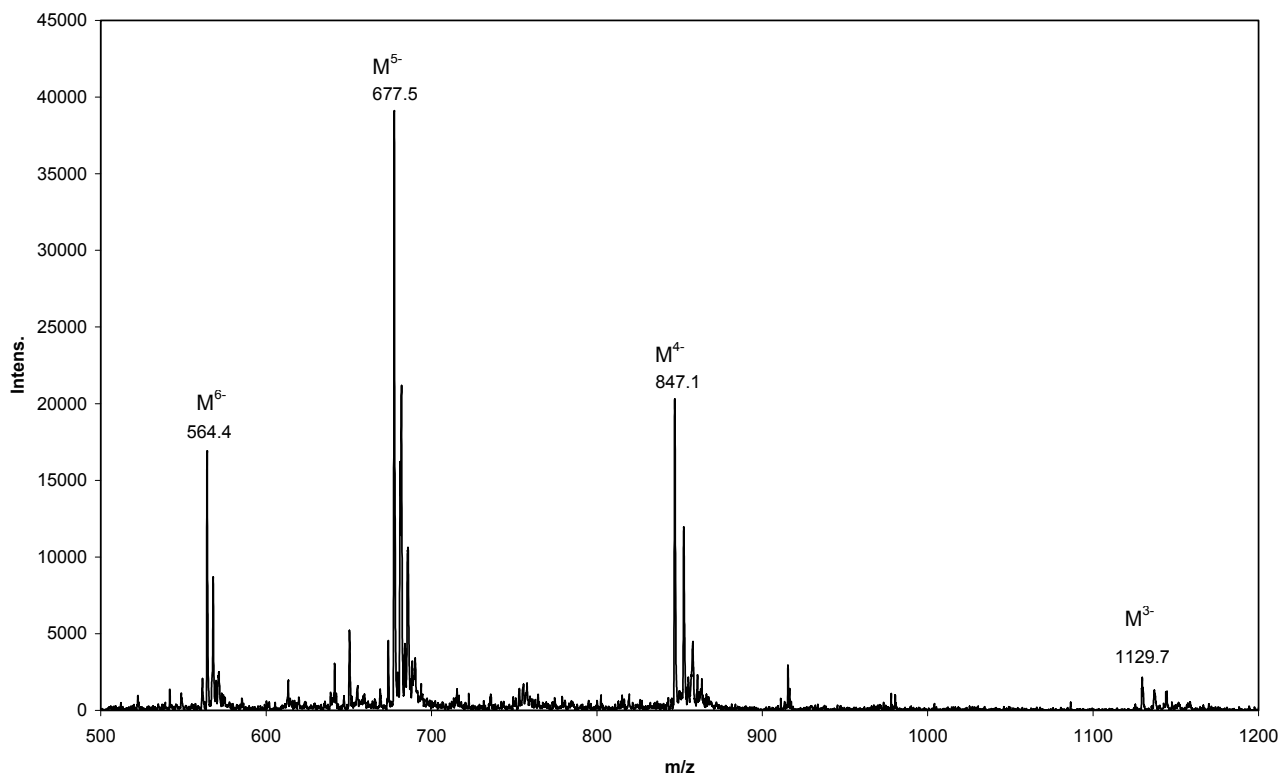

Fig 15. ESIMS (negative mode) of purified oligonucleotide 3'-aldehyde **8** ( $m/z$ : calcd = 3392.2).

## IX. Spectroscopic characterisation data for free aminoxy linker 9

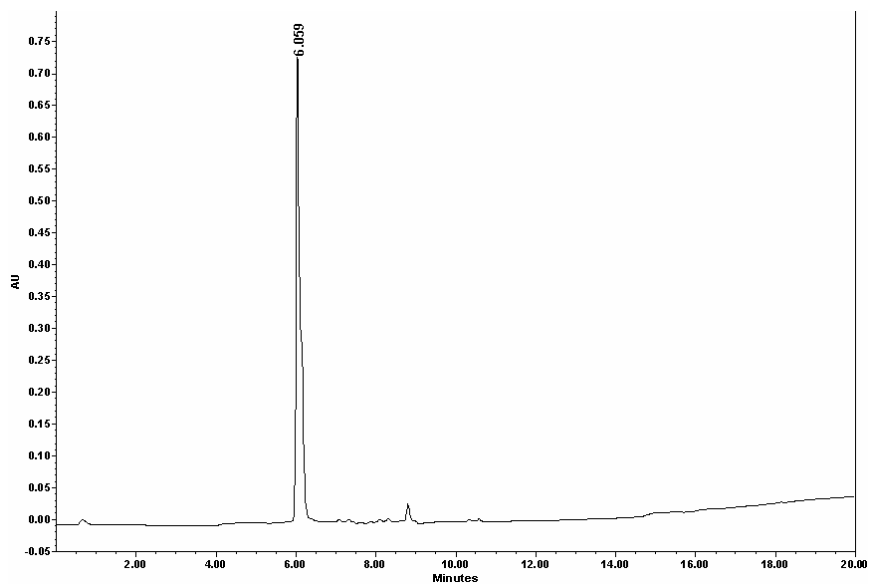

Fig 16. RP-HPLC profile ( $\lambda_{\text{abs}} = 250 \text{ nm}$ ) of crude free aminoxy linker 9.

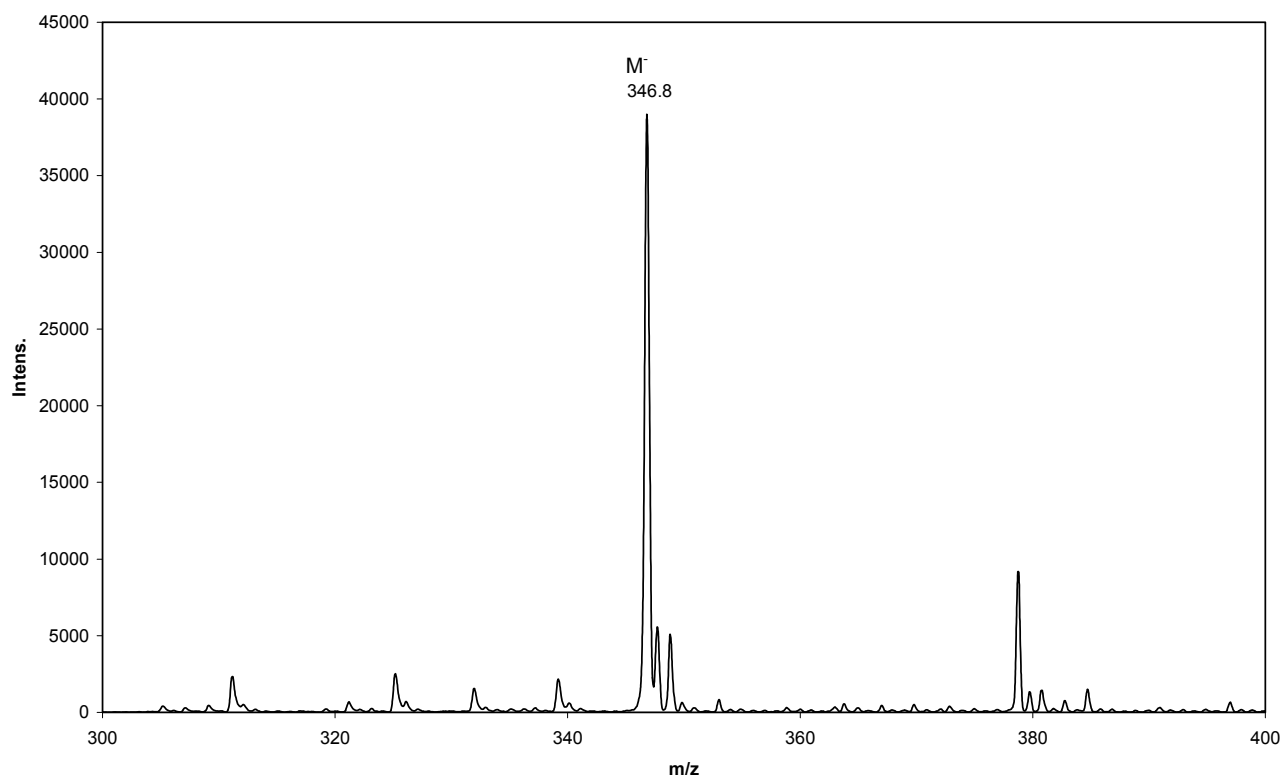

Fig 17. ESIMS (negative mode) of crude free aminoxy linker 9 ( $m/z$ : calcd = 347.4).

## X. Spectroscopic characterisation data for oligonucleotide–linker conjugate **10**

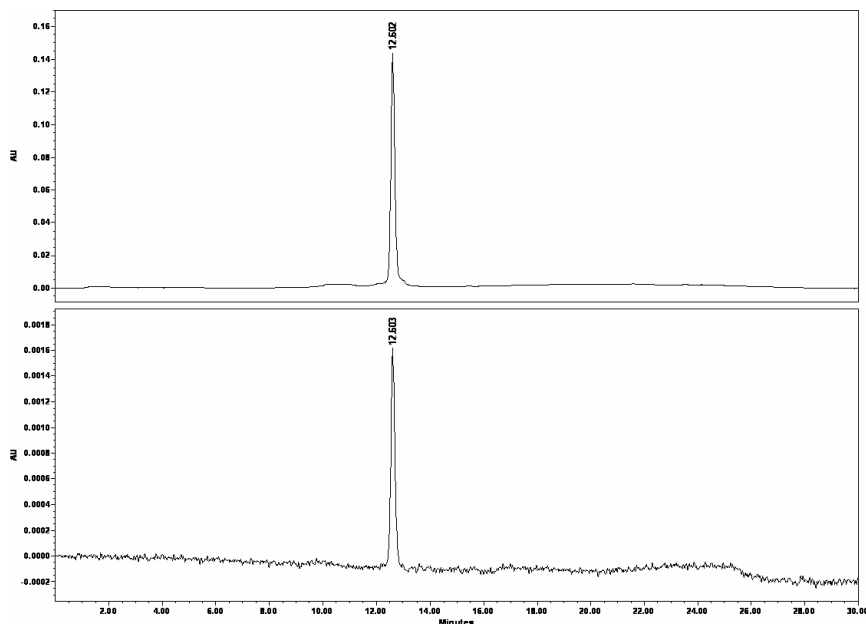

Fig 18. RP-HPLC profile ( $\lambda_{\text{abs}} = 260$  and 400 nm) of purified oligonucleotide–linker conjugate **10**.

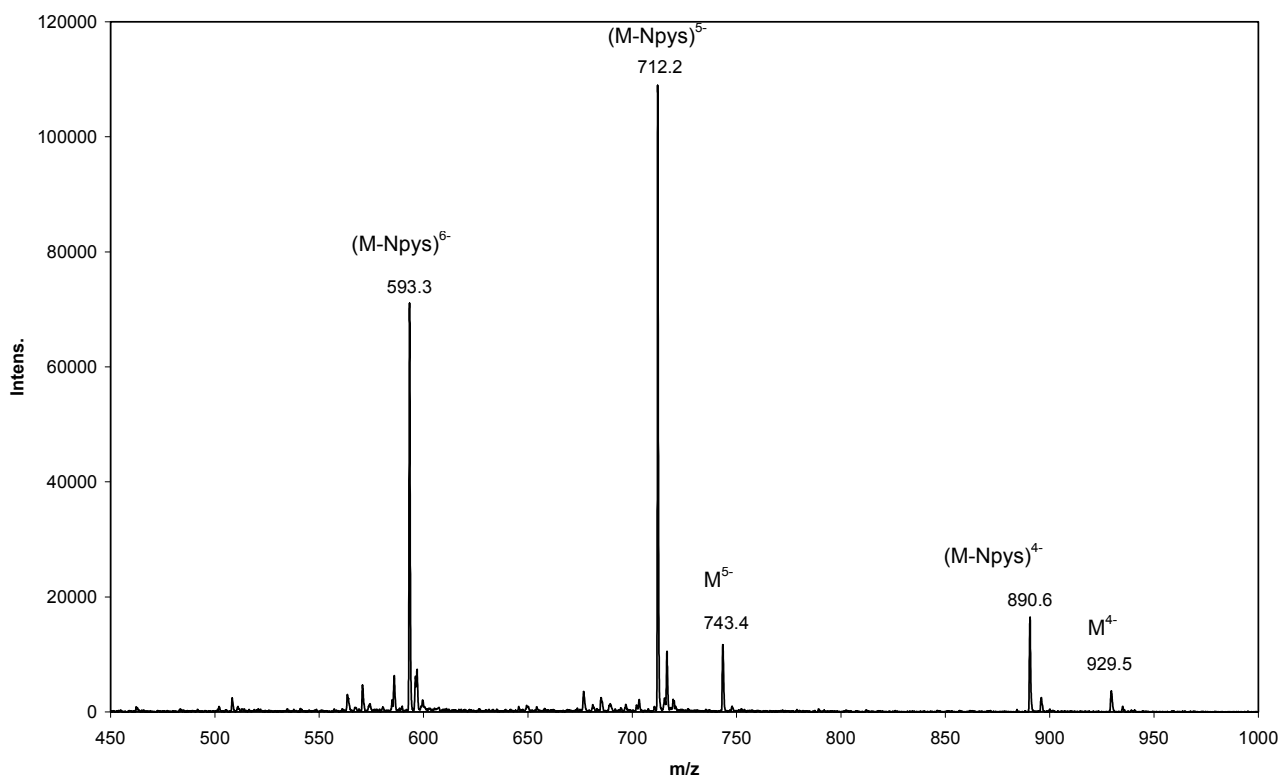

Fig 19. ESIMS (negative mode) of purified oligonucleotide–linker conjugate **10** ( $m/z$ : calcd = 3722.6).

## XI. DTT treatment<sup>1</sup> of oligonucleotide–linker conjugate **10**

Oligonucleotide–linker conjugate **10** (10 nmol, 35  $\mu$ L) was suspended in a solution of DTT (10 mM) and the reaction was followed by RP-HPLC. Complete dispartition of the peak corresponding to the NPys protection was observed after a night's  
90 reaction. The chromatogram recorded after 15 min of reaction shows that peaks corresponding to Npys protected (RT = 13.1 min) and unprotected (RT = 11.9 min) oligonucleotide–linker conjugates are well resolved and hence must not have been collected together during the HPLC purification of the conjugate **10**. The NPys loss observed during the ESIMS analysis of the conjugate therefore must be due to the triethylamine solution added during the mass analysis.

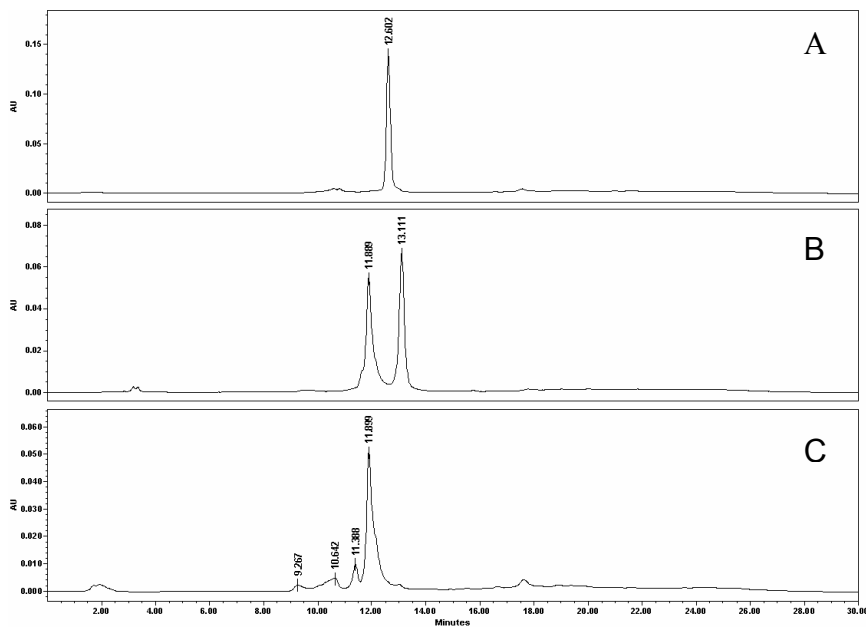

**Fig 20.** RP-HPLC profile ( $\lambda_{\text{abs}} = 260$  nm) of purified oligonucleotide–linker conjugate **10** during the DTT treatment. (A) before treatment; (B) after 15 min of treatment and (C) overnight treatment.

95

## XII. Notes and references

100 1 F. Maurel, F. Debart, F. Cavalier, A. R. Thierry, B. Lebleu and J.-J. Vasseur, *Bioorg. Med. Chem.*, 2005, **15**, 5084-5087.

105
